# Supplementary material
Source: PubMed Central journal article supplement (PMC7960287)
Supplement: 15-01150.pdf [file 15-01150.pdf]

**On-line Table: Scores of the degree of myelination for MPRAGE and PETRA at each assessed location with intrarater agreement**

| Assessed Location                                           | Reader 1            |                    |                          | Reader 2            |                    |                          |                  |
|-------------------------------------------------------------|---------------------|--------------------|--------------------------|---------------------|--------------------|--------------------------|------------------|
|                                                             | MPRAGE <sup>a</sup> | PETRA <sup>a</sup> | Differences <sup>b</sup> | MPRAGE <sup>a</sup> | PETRA <sup>a</sup> | Differences <sup>b</sup> | ICC <sup>c</sup> |
| Cerebellar white matter                                     | 2.9 ± 0.3 (2-3)     | 2.9 ± 0.3 (2-3)    | 0.00 (0.00-0.00)         | 2.9 ± 0.3 (2-3)     | 3 ± 0 (3)          | 0.09 (0.01-0.17)         | <.01             |
| Anterior part of the posterior limb of the internal capsule | 2.8 ± 0.6 (0-3)     | 2.8 ± 0.7 (0-3)    | -0.07 (-0.17-0.03)       | 2.8 ± 0.5 (1-3)     | 2.9 ± 0.4 (1-3)    | 0.05 (-0.03-0.13)        | 0.80 (0.68-0.88) |
| Corpus callosum                                             |                     |                    |                          |                     |                    |                          |                  |
| Genu                                                        | 2.7 ± 0.8 (0-3)     | 2.7 ± 0.7 (0-3)    | 0.02 (-0.08-0.12)        | 2.7 ± 0.6 (1-3)     | 2.8 ± 0.6 (1-3)    | 0.02 (-0.02-0.06)        | 0.98 (0.96-0.99) |
| Splenium                                                    | 2.9 ± 0.4 (1-3)     | 2.8 ± 0.5 (0-3)    | -0.04 (-0.11-0.04)       | 2.8 ± 0.5 (1-3)     | 2.8 ± 0.5 (1-3)    | 0.00 (-0.05-0.05)        | 0.83 (0.73-0.90) |
| Subcortical white matter                                    |                     |                    |                          |                     |                    |                          |                  |
| Anterior frontal lobe                                       | 2.1 ± 1.0 (0-3)     | 2.2 ± 1.0 (0-3)    | 0.09 (-0.02-0.19)        | 2.3 ± 1.0 (0-3)     | 2.3 ± 1.1 (0-3)    | -0.04 (-0.14-0.07)       | 0.93 (0.89-0.96) |
| Anterior temporal lobe                                      | 1.7 ± 0.9 (0-3)     | 1.6 ± 1.0 (0-3)    | -0.05 (-0.20-0.09)       | 2.1 ± 1.1 (0-3)     | 2.0 ± 1.2 (0-3)    | -0.16 (-0.34-0.01)       | 0.83 (0.73-0.90) |
| Posterior occipital lobe                                    | 2.5 ± 0.9 (0-3)     | 2.6 ± 0.8 (0-3)    | 0.05 (-0.04-0.15)        | 2.6 ± 1.0 (0-3)     | 2.6 ± 0.8 (0-3)    | 0.05 (-0.03-0.13)        | 0.94 (0.91-0.97) |

<sup>a</sup> Data are mean scores ± SD with range in parentheses. Scores closer to 3 indicate good visibility, whereas scores closer to zero indicate poorer visibility of myelination.

<sup>b</sup> The mean differences in the PETRA to MPRAGE scores; numbers in parentheses are the 95% CIs.

<sup>c</sup> Numbers in parentheses are 95% CIs.
